# Supplementary material for: Unifying cancer and normal RNA sequencing data from different sources
Source: PubMed Central journal article supplement (PMC5903355; doi:10.1038/sdata.2018.61), 2018-04-17
Supplement: sdata201861-s2.pdf [file sdata201861-s2.pdf]

## Supplementary information for *Unifying cancer and normal RNA sequencing data from different sources*

| <b>Supplementary Figures</b>                                                                                                                                                                                                                                                                                                                                                                                                                                          | <b>Page</b> |
|-----------------------------------------------------------------------------------------------------------------------------------------------------------------------------------------------------------------------------------------------------------------------------------------------------------------------------------------------------------------------------------------------------------------------------------------------------------------------|-------------|
| <b>Figure S1.</b> (a) Ranges of GTEx and TCGA RNA-seq gene expression levels in bladder normal samples, as obtained from GTEx and TCGA, without any additional normalization. Expression values from both projects are on different scales and can therefore not be compared directly without further processing or normalization. (b) Gene expression levels in GTEx samples were scaled using quantile normalization.                                               | 1           |
| <b>Figure S2.</b> PCA plot after applying quantile normalization and ComBat to the level 3 data of the 3 tissues, bladder, prostate, and thyroid, from GTEx and TCGA.                                                                                                                                                                                                                                                                                                 | 2           |
| <b>Figure S3.</b> Gene body coverage of the TCGA prostate and bladder samples. Each curve in the figure represents average coverage of genes (from 5' to 3') in a sample – the different colors are used to indicate the different samples. To ease visual examination, only long genes (>4000 nt) were used in the calculation of the coverage and only the normal samples were plotted. Samples that were excluded due to a 3'/5' bias are shown with dashed lines. | 3           |
| <b>Figure S4.</b> Expression of the gene <i>PGA3</i> in six tissues. Gene expression in (a) and (b) were quantified using FeatureCounts and RSEM, respectively. The same set of GTEx and TCGA (both tumor and normal) samples was used to compare FeatureCounts and RSEM for each tissue type.                                                                                                                                                                        | 4           |
| <b>Figure S5.</b> Two-dimensional plots of principal components calculated by performing PCA of the batch-corrected gene expression in breast, liver, and lung samples from GTEx and TCGA.                                                                                                                                                                                                                                                                            | 5           |
| <b>Figure S6.</b> Effect of removing batch biases between TCGA and GTEx as a whole. For the three tissue types, bladder, prostate, and thyroid, processed through our pipeline, all TCGA normal samples were used as one batch and GTEx normal samples as another batch to run ComBat. Two-dimensional plots are shown of principal components calculated by performing PCA on the gene expression values after removing batch biases.                                | 6           |
| <b>Supplementary Tables</b>                                                                                                                                                                                                                                                                                                                                                                                                                                           |             |
| <b>Table S1.</b> Samples with no or insufficient numbers of normal samples available in TCGA or GTEx.                                                                                                                                                                                                                                                                                                                                                                 | 7           |
| <b>Table S2.</b> Parameters of ComBat for: (a) bladder, and (b) lung. TCGA lung cancer has two subtypes: lung adenocarcinoma (LUAD) and lung squamous cell carcinoma (LUSC). LUSC was designated in the same batch as LUAD.                                                                                                                                                                                                                                           | 8           |

a.

GTEEx and TCGA RNA-seq gene expression in bladder

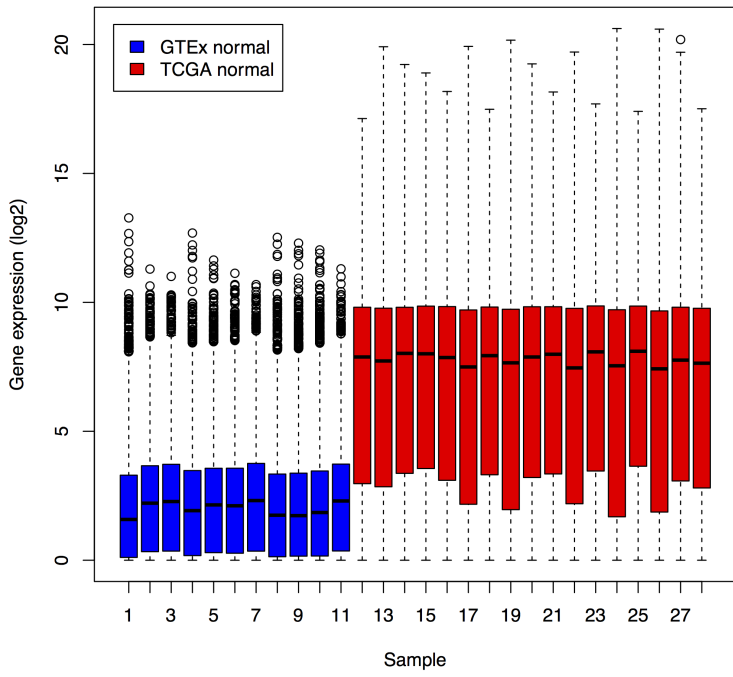

b.

GTEEx and TCGA RNA-seq gene expression in bladder

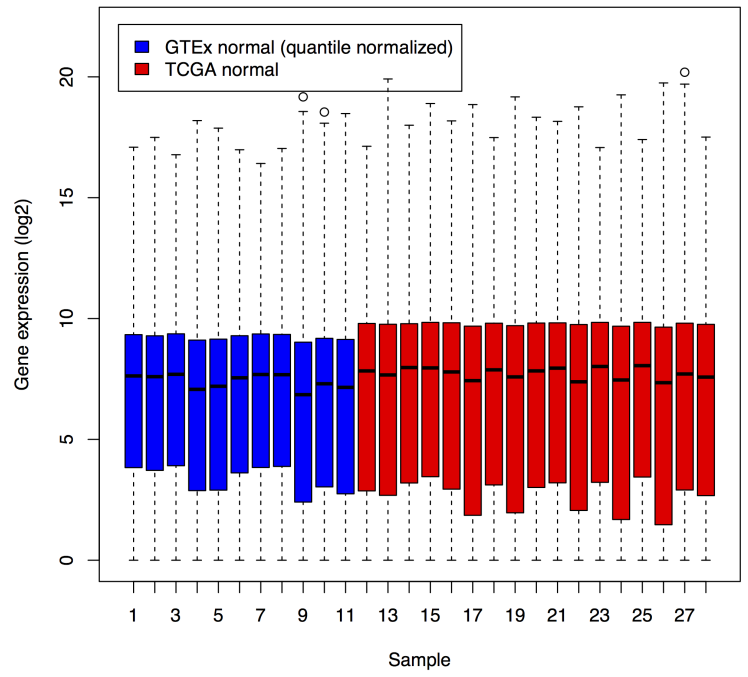

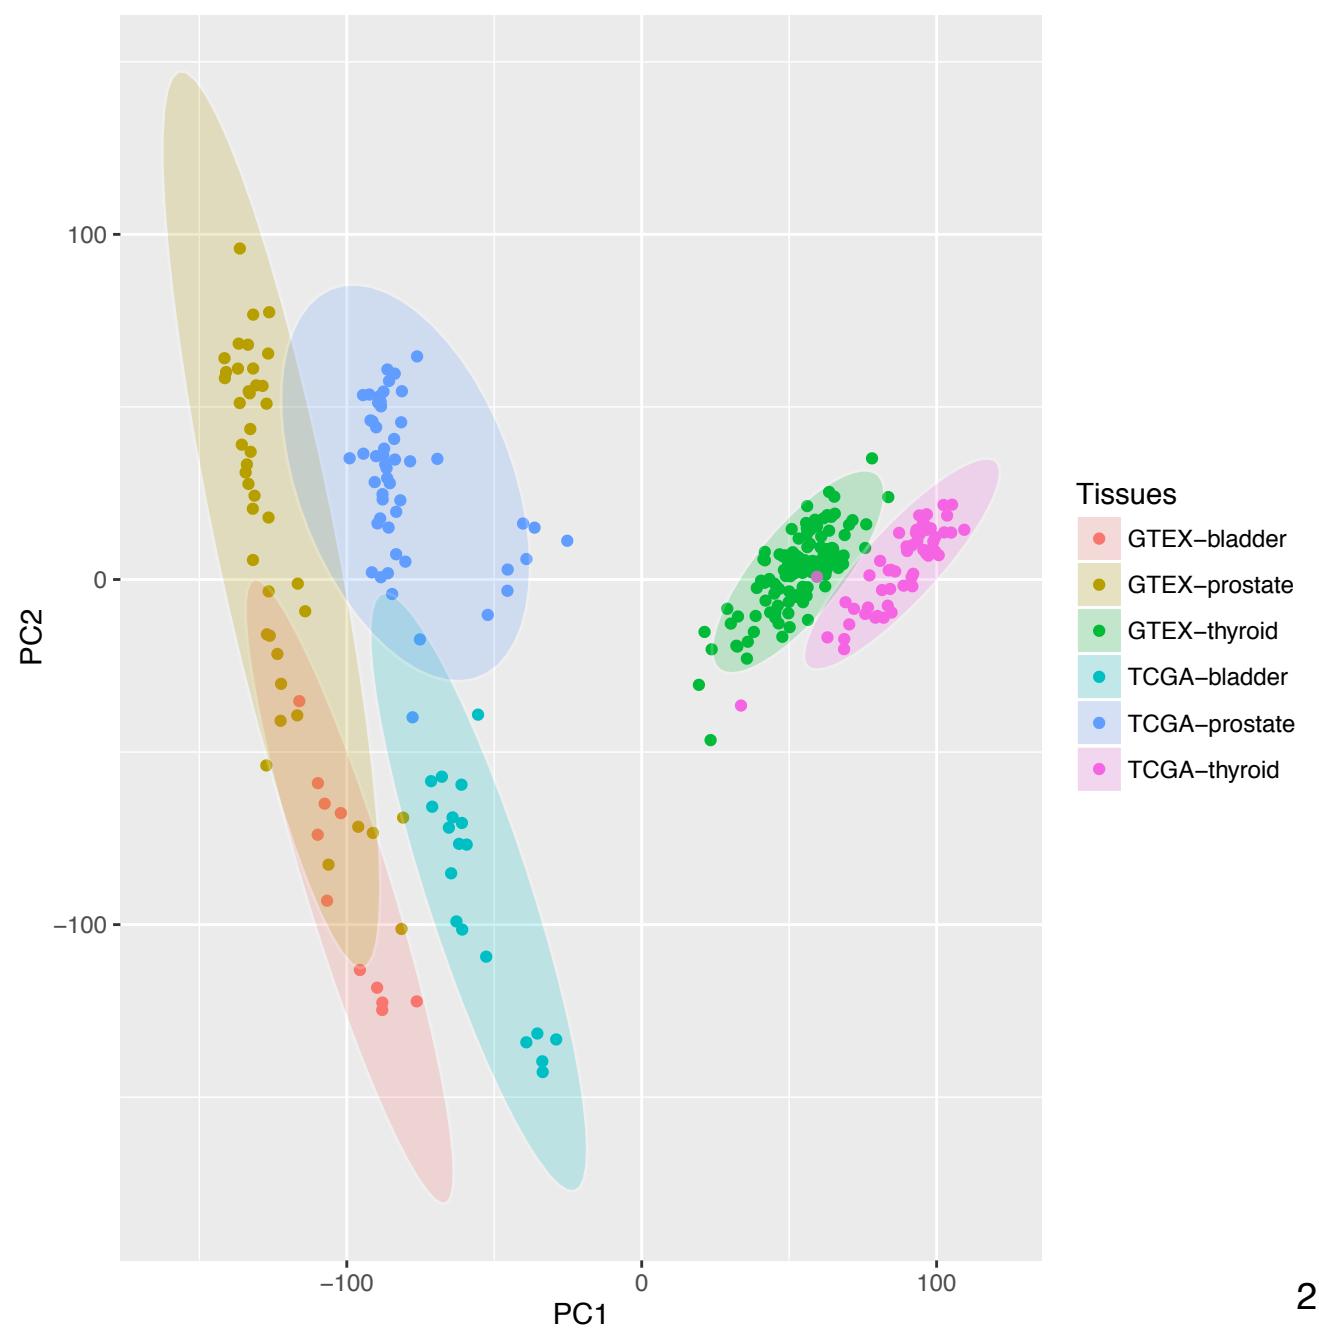

a.

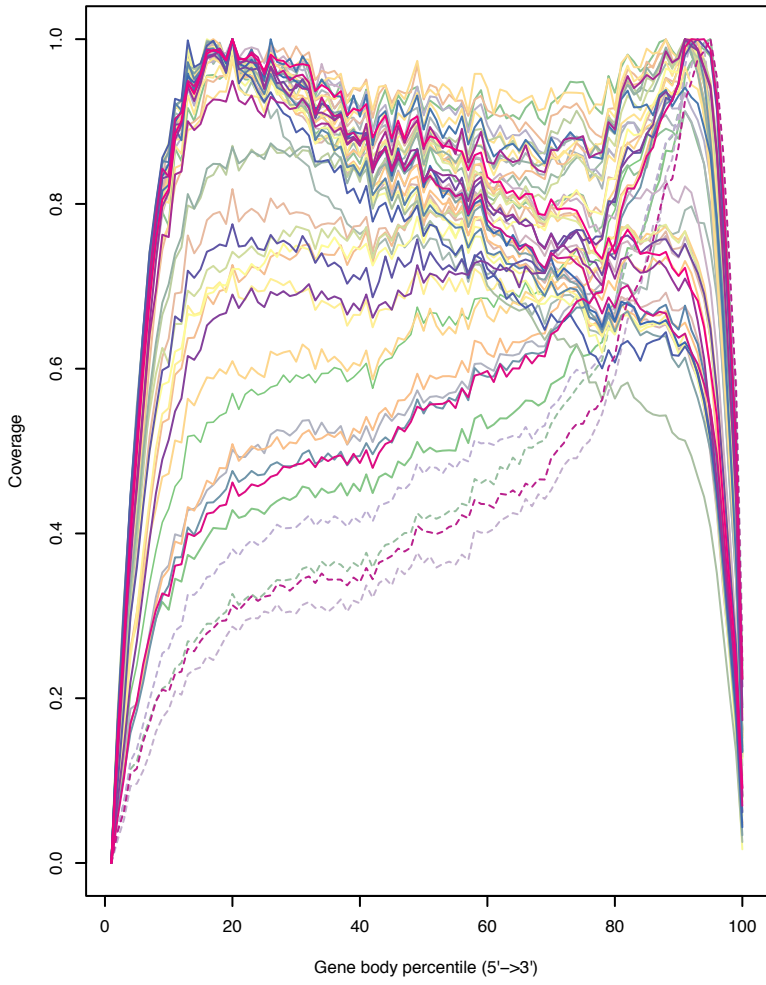

b.

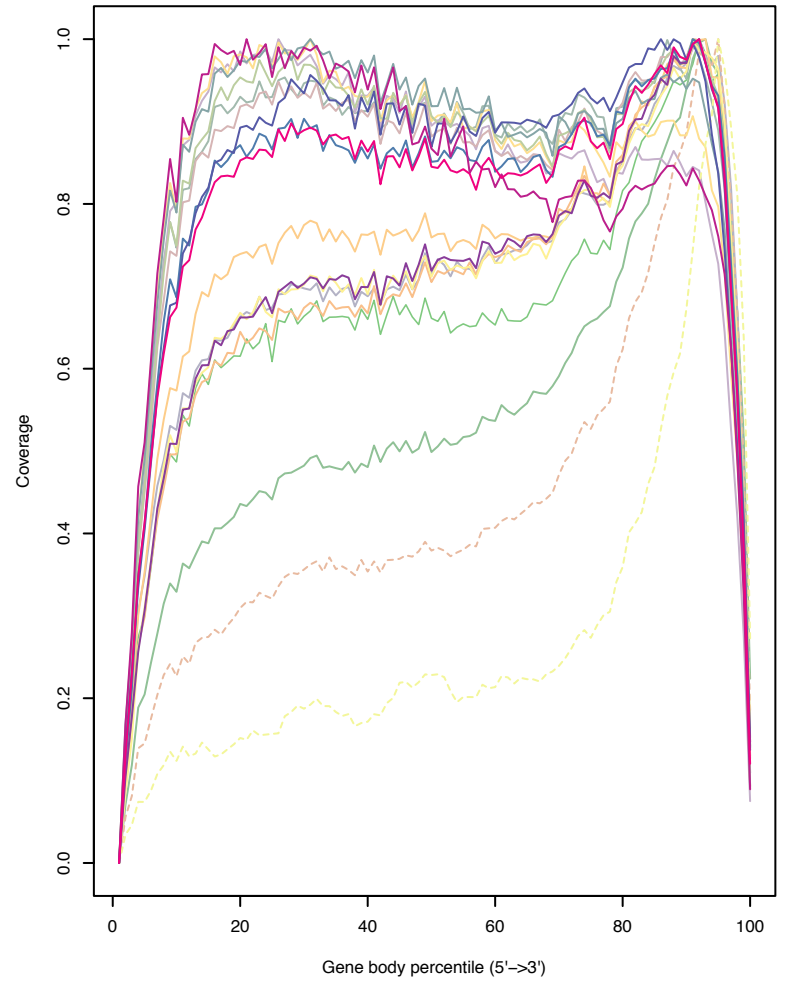

a. **PGA3 expression by FeatureCounts**

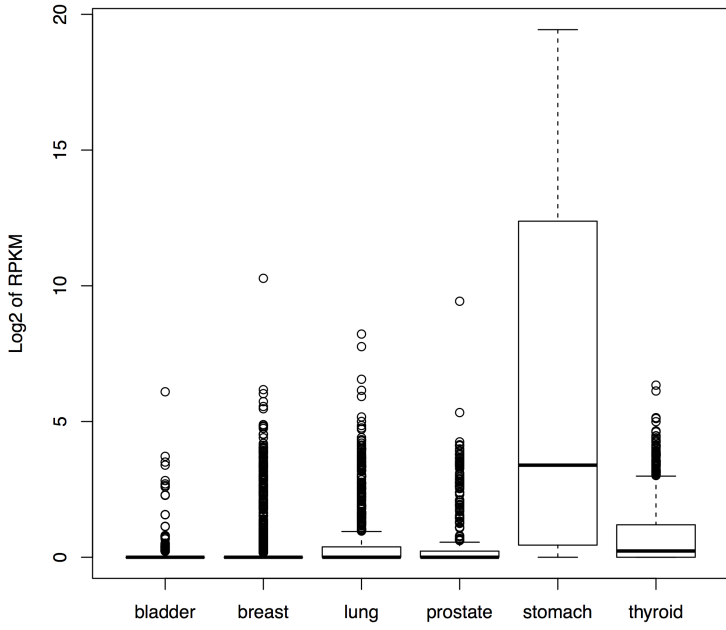

b. **PGA3 expression by RSEM**

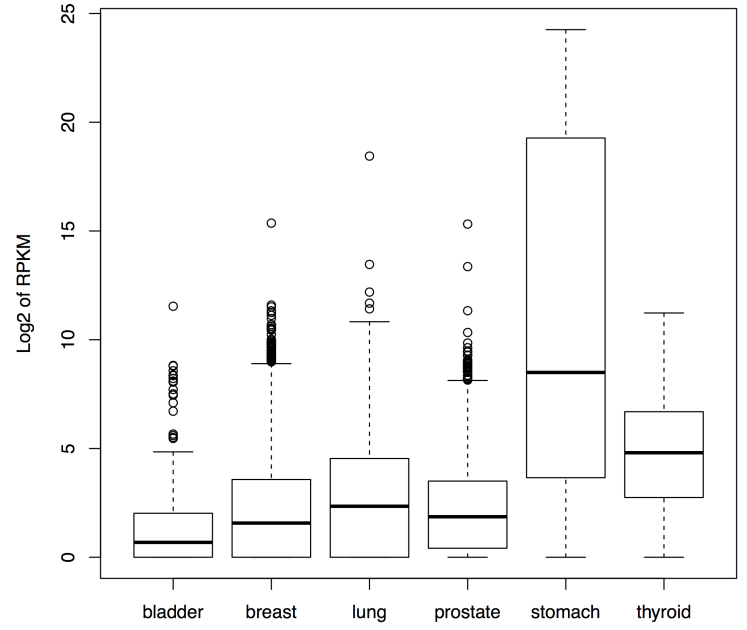

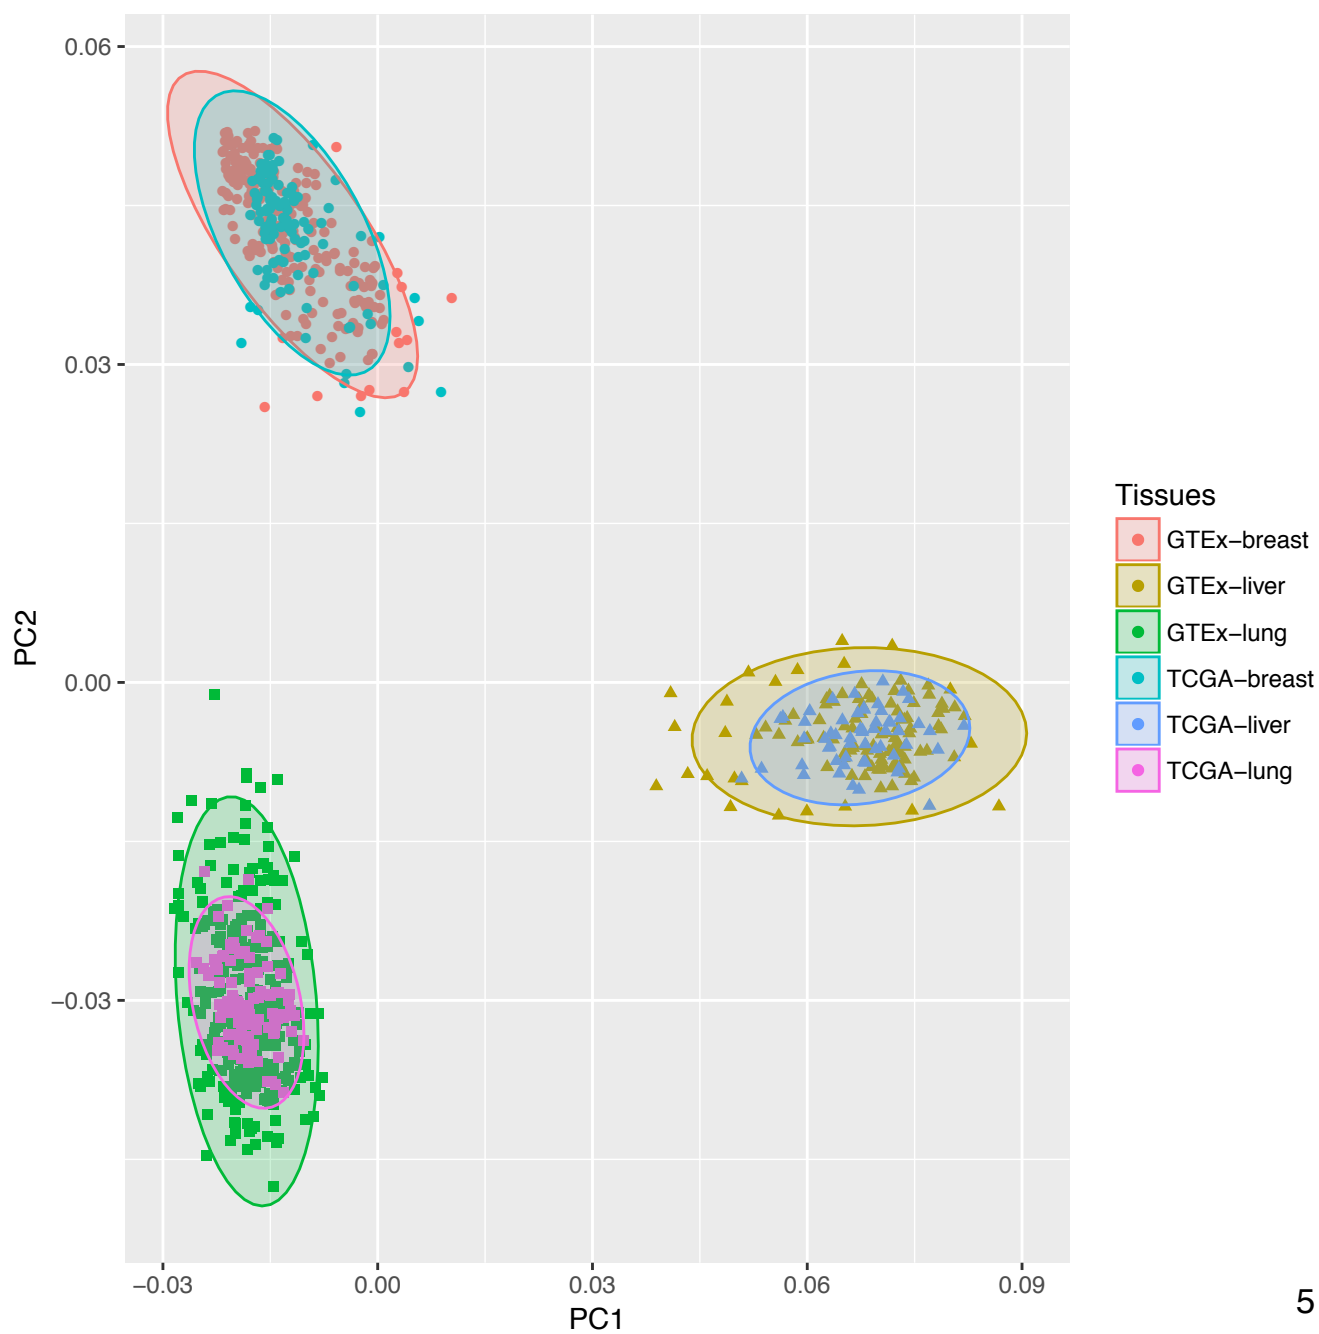

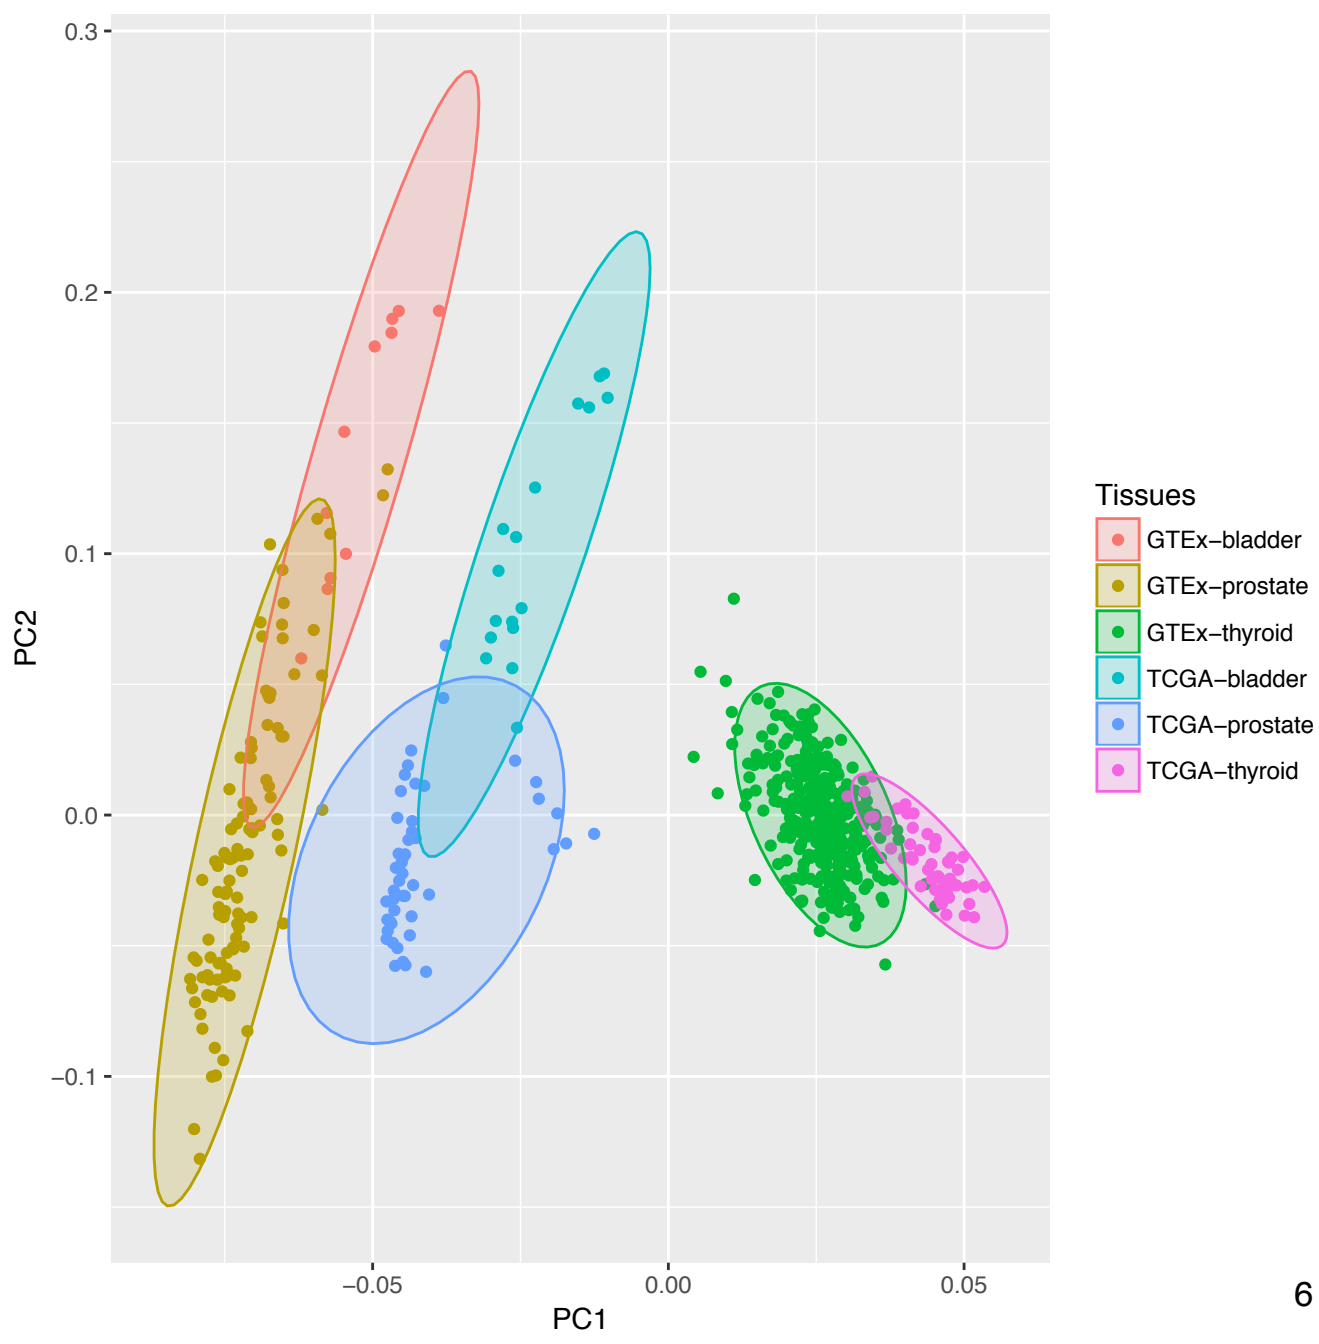

**Table S1.** Samples with no or insufficient numbers of normal samples available in TCGA or GTEx.

| GTEx tissue / TCGA cancer type | GTEx        | TCGA normal | TCGA tumor  | Total       |
|--------------------------------|-------------|-------------|-------------|-------------|
| adipose / sarc                 | 621         | 2           | 259         | 882         |
| blood / laml                   | 456         | 0           | 0           | 456         |
| none / chol                    | 0           | 9           | 36          | 45          |
| none / dlbc                    |             | 0           | 48          | 48          |
| adrenal gland / acc            | 159         | 0           | 79          | 238         |
| adrenal gland / pcpg           |             | 3           | 179         | 182         |
| brain / gbm                    | 1403        | 0           | 156         | 1559        |
| brain / lgg                    |             | 0           | 516         | 516         |
| ovary / ov                     | 108         | 0           | 294         | 402         |
| pancreatic / paad              | 197         | 4           | 178         | 379         |
| skin / skcm                    | 974         | 1           | 103         | 1078        |
| small intestine / none         | 104         | 0           | 0           | 104         |
| testis / tgct                  | 203         | 0           | 150         | 353         |
| none / thym                    |             | 2           | 120         | 122         |
| none / meso                    |             | 0           | 87          | 87          |
| none / uvm                     |             | 0           | 80          | 80          |
| <b>Total</b>                   | <b>4225</b> | <b>21</b>   | <b>2285</b> | <b>6531</b> |



**Table S2.** Parameters of ComBat for: (a) bladder, and (b) lung. TCGA lung cancer has two subtypes: lung adenocarcinoma (LUAD) and lung squamous cell carcinoma (LUSC). LUSC was designated in the same batch as LUAD.

**(a)** Parameters of ComBat for bladder

|                             | GTEX bladder | TCGA BLCA normal | TCGA BLCA tumor |
|-----------------------------|--------------|------------------|-----------------|
| <b>Batch</b>                | 1            | 2                | 2               |
| <b>Variable of interest</b> | normal       | normal           | tumor           |

**(b)** Parameters of ComBat for lung

|                             | GTEX lung | TCGA LUAD normal | TCGA LUAD tumor | TCGA LUSC normal | TCGA LUSC tumor |
|-----------------------------|-----------|------------------|-----------------|------------------|-----------------|
| <b>Batch</b>                | 1         | 2                | 2               | 2                | 2               |
| <b>Variable of interest</b> | normal    | normal           | tumor           | normal           | tumor           |
